# Supplementary material for: The glyoxylate shunt is essential for desiccation tolerance in C. elegans and budding yeast
Source: eLife journal article supplement (doi:10.7554/elife.13614), 2016-04-19

**A**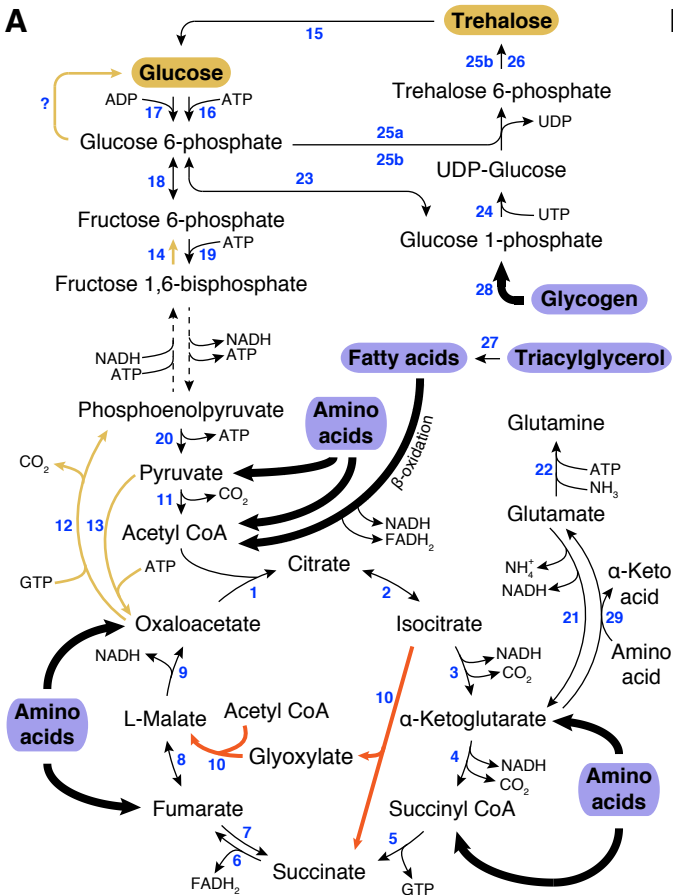**B**

TCA cycle and glyoxylate shunt

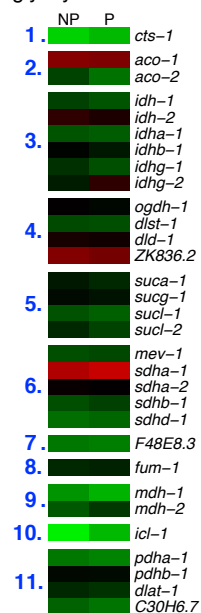

Glycolysis and gluconeogenesis

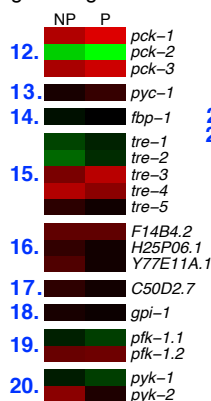

Trehalose biosynthesis

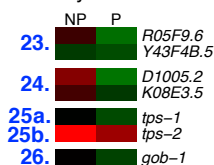

Lipolysis

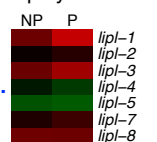

Glycogenolysis

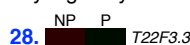

Amino acid turnover

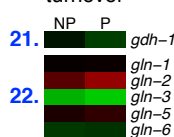

Carbon source

Gluconeogenesis end product

- Gluconeogenesis-specific reaction
- Glyoxylate shunt
- Entry route of carbon source
- Successive reactions

Log<sub>2</sub> Expression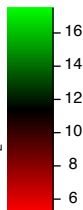

Supplement: supp [file elife-13614-supp-v1.zip]
