# Supplementary figures and images for: The glyoxylate shunt is essential for desiccation tolerance in C. elegans and budding yeast
Source: eLife journal article supplement (doi:10.7554/elife.13614), 2016-04-19

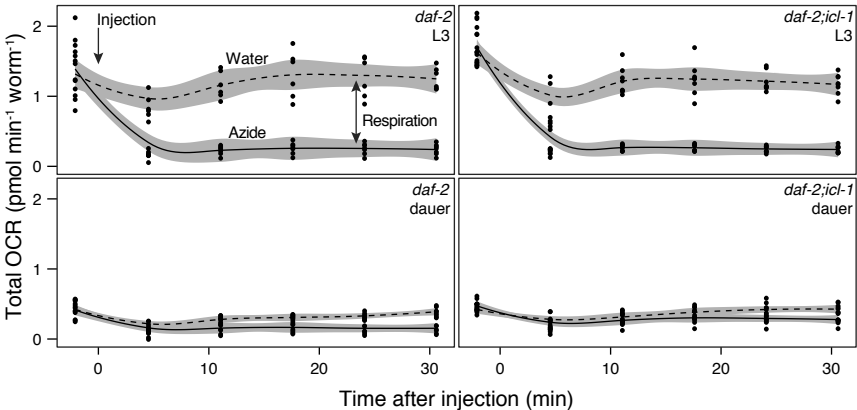

Supplement: supp [file elife-13614-supp-v1.zip]

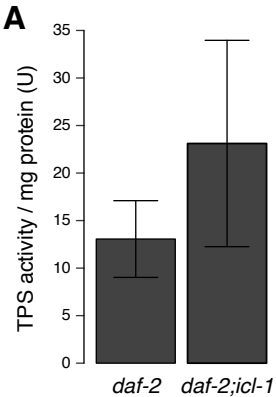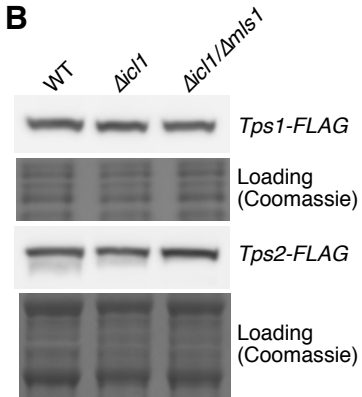

Supplement: supp [file elife-13614-supp-v1.zip]

L3 larva

Pharynx

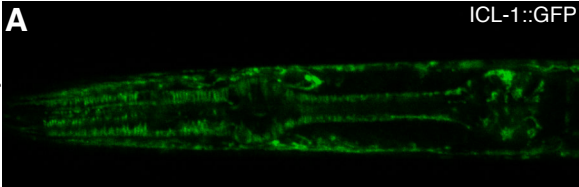

Gut

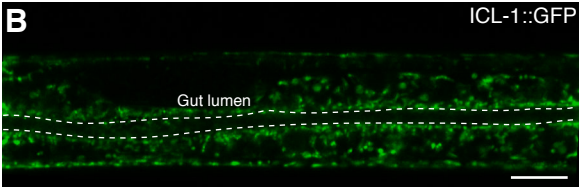

Supplement: supp [file elife-13614-supp-v1.zip]

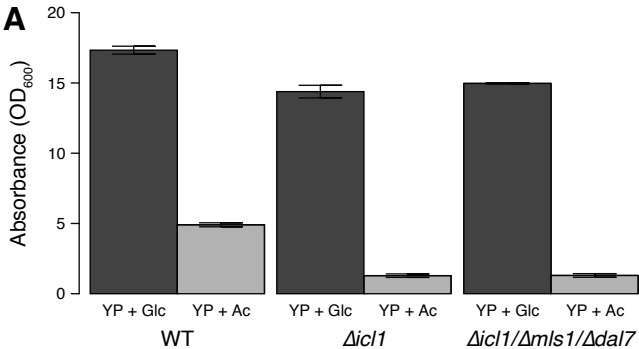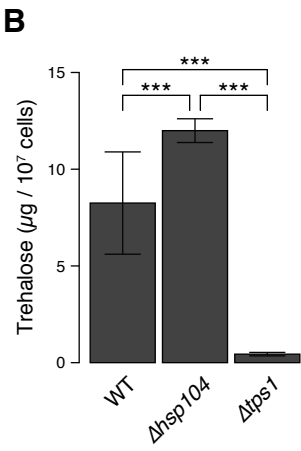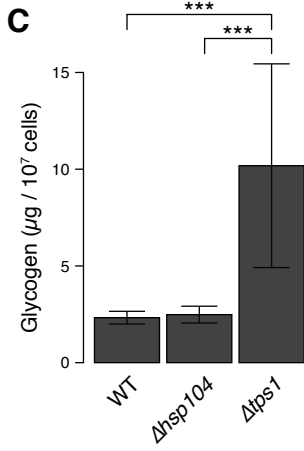

Supplement: supp [file elife-13614-supp-v1.zip]

**A**

5.1 cm / 7.0 cm

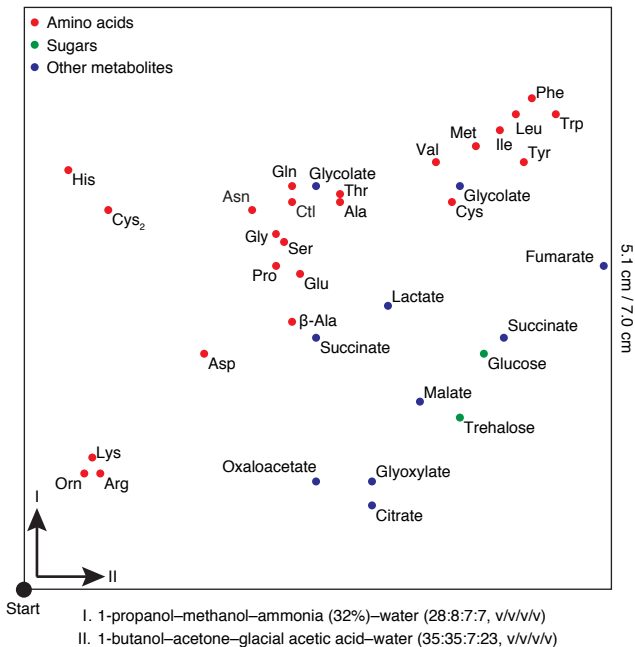**B**

TAGs

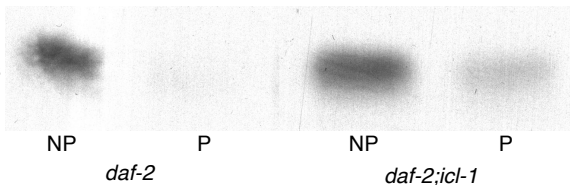

Supplement: supp [file elife-13614-supp-v1.zip]

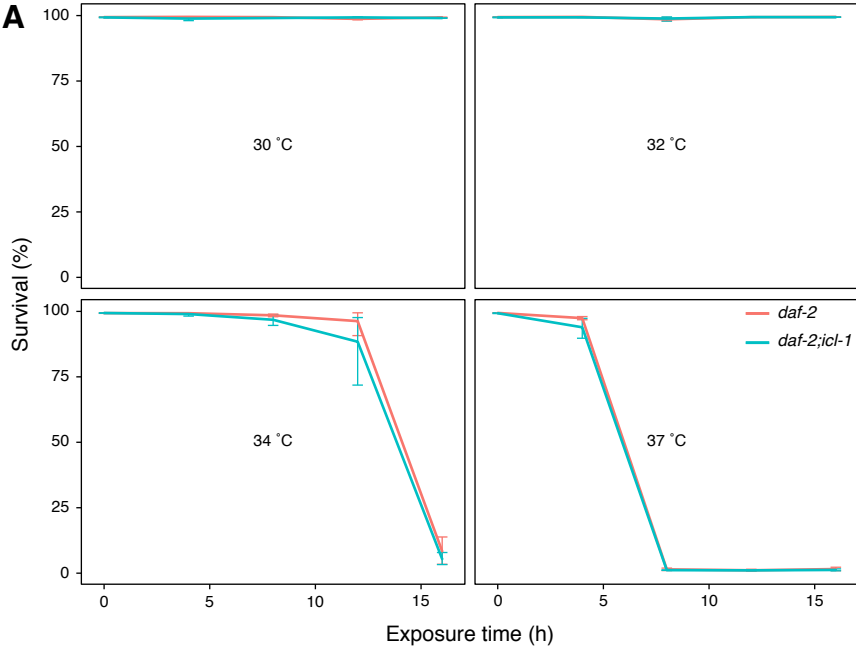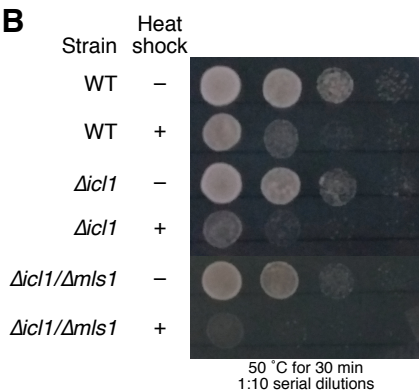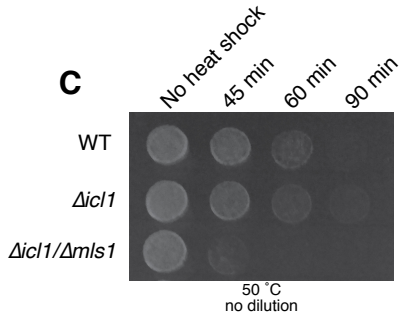

Supplement: supp [file elife-13614-supp-v1.zip]
